# Supplementary material for: Treatment with IFB-088 Improves Neuropathy in CMT1A and CMT1B Mice
Source: PubMed Central journal article supplement (PMC9167212; doi:10.1007/s12035-022-02838-y), 2022-04-30
Supplement: 12035_2022_2838_MOESM1_ESM.pdf [file 12035_2022_2838_MOESM1_ESM.pdf]

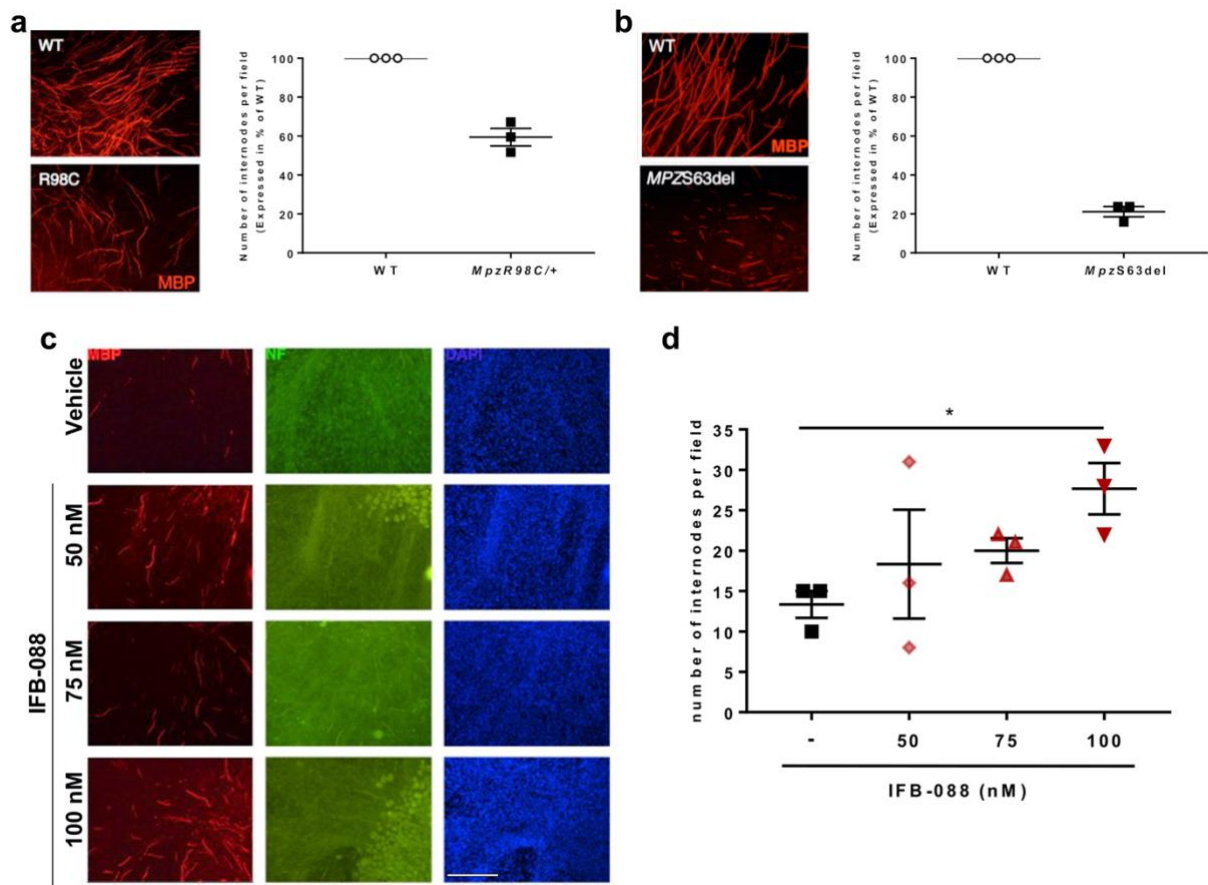

Supplementary Figure 1

**Supplemental Figure 1: IFB-088 improves myelination in DRG explants from *MpzS63del* mice.** Dorsal root ganglia (DRG) were dissected from embryos (E13.5) of *MpzS63del* mice and *MpzR98C/+* mice. The myelination process was induced with ascorbic acid. After 2-week of treatment with vehicle or the indicated concentration of IFB-088, the DRGs were fixed and nuclei visualized by DAPI staining; axons and myelin were visualized by immunostaining with neurofilament antibody (NF) and with myelin basic protein (MBP) antibodies respectively. **(a)** Representative pictures and number of myelinated internodes per field, expressed in % of WT, in WT and *MpzR98C/+* DRG explant cultures treated with vehicle for 2 weeks. **(b)** Representative pictures and number of myelinated internodes per field, expressed in % of WT, in WT and *MpzS63del* DRG explant cultures treated with vehicle for 2 weeks. **(c)** Representative pictures. **(d)** Number of myelinated internodes per field in *MpzS63del* DRG explant cultures treated with vehicle or the indicated concentration of IFB-088 for 2 weeks. Mean  $\pm$ SEM.  $n=3$  independent experiments.  $*P<0.05$  One-way ANOVA followed by Friedman's test.

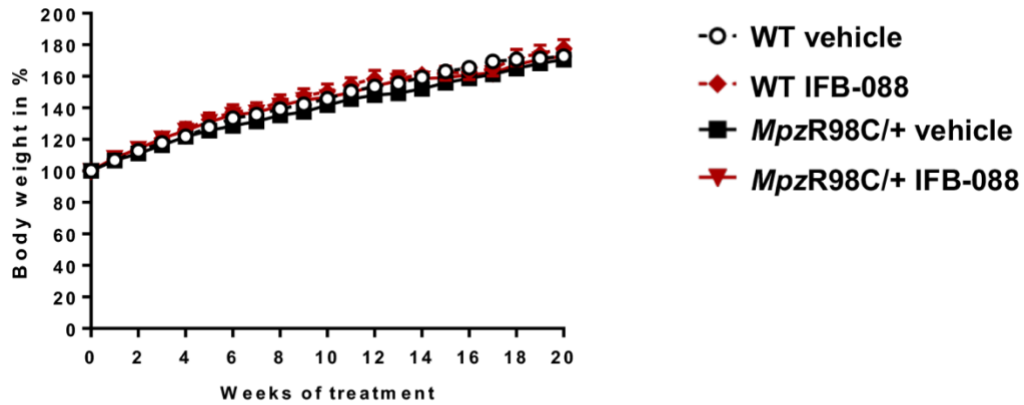

## Supplementary Figure 2

**Supplemental Figure 2: IFB-088 treatment does not impact WT and *MpzR98C/+* mice body weight.** Body weight of WT and *MpzR98C/+* mice treated with vehicle *b.i.d.* or IFB-088 1 mg/kg *b.i.d.* expressed in % of body weight over 20-week treatment periods ( $n=19-36$  mice per condition).

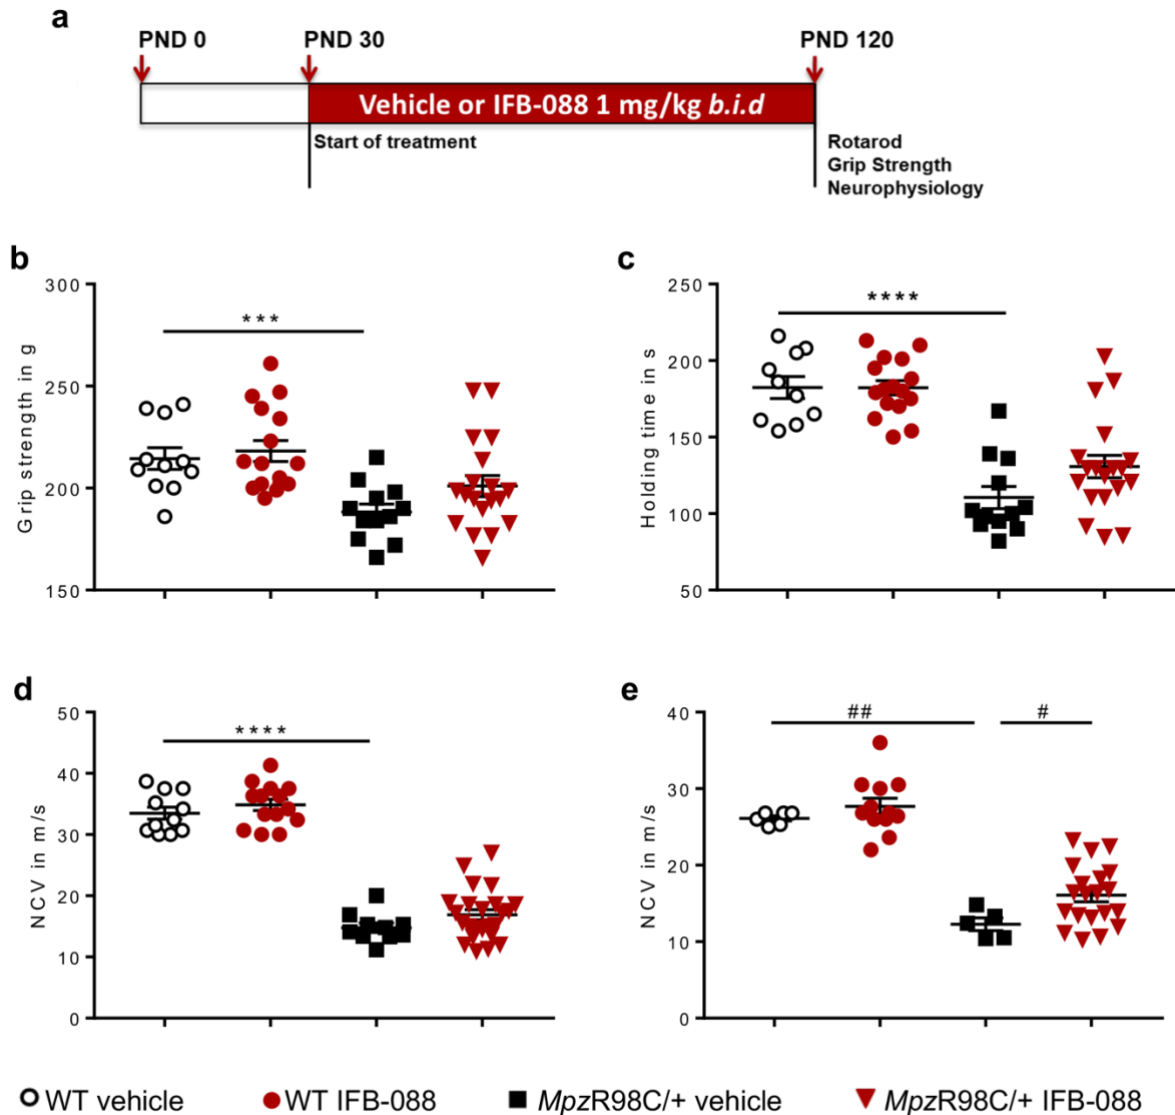

**Supplementary Figure 3**

**Supplemental Figure 3: Impact of 3-month IFB-088 treatment on motor function and nerve conduction velocity in *MpzR98C/+* mice.** (a) Diagram of the treatment strategy. 30-day-old WT and *MpzR98C/+* mice were orally administered with vehicle *b.i.d.* or IFB-088 1mg/kg *b.i.d.* for 3 months. (b) Four limb grip strength max values average of 10 trials. Data were expressed in grams (g) as mean  $\pm$ SEM.  $n=11-19$  mice per condition. (c) Rotarod analysis. Data are expressed in seconds (s) as mean  $\pm$ SEM.  $n=10-19$  mice per condition. (d) Motor nerve conduction velocity (MNCV). Data are expressed in meter/second (m/s) as mean  $\pm$ SEM.  $n=10-24$  mice per condition. (e) Sensory nerve conduction velocity (SNCV). Data are expressed in meter/second (m/s) as mean  $\pm$ SEM.  $n=5-20$  mice per condition. \*\*\* $P<0.001$ , \*\*\*\* $P<0.0001$  by Student's T-test; # $P<0.05$ , ## $P<0.01$  Mann-Whitney.

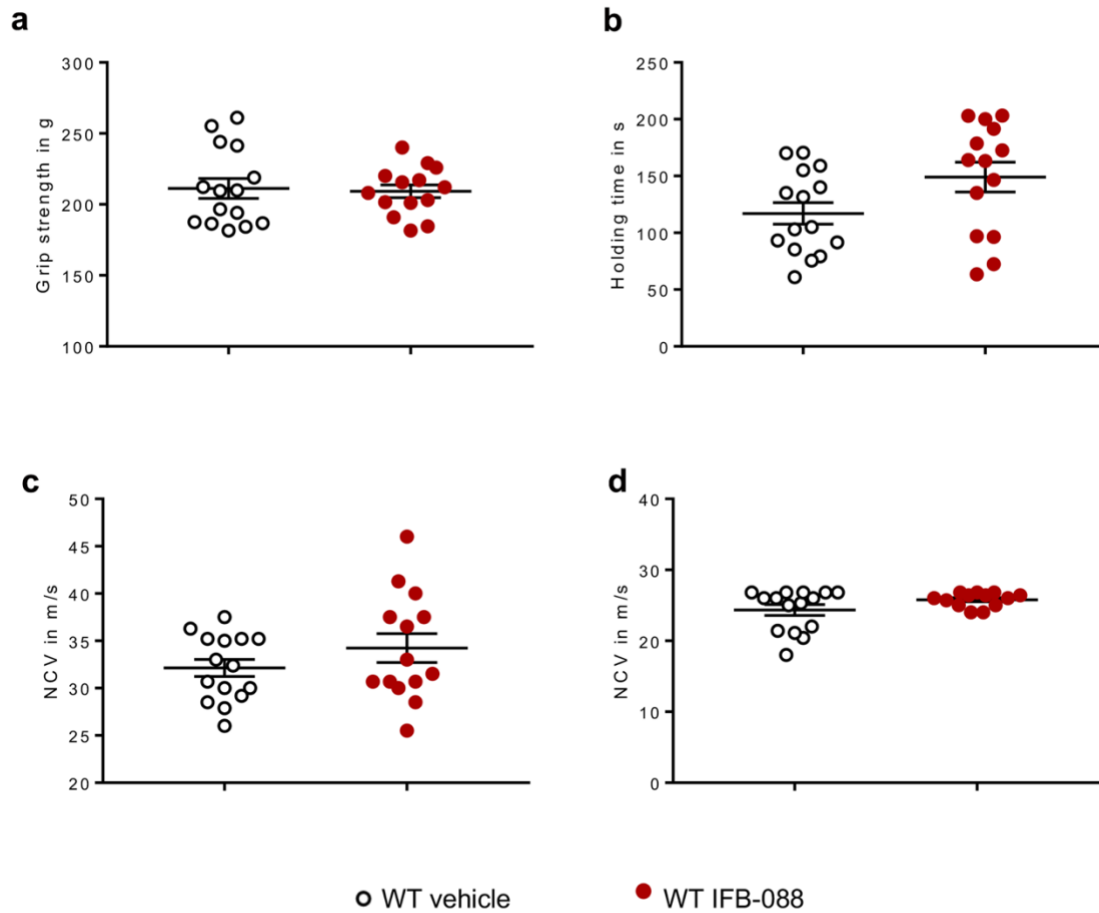

**Supplementary Figure 4**

**Supplemental Figure 4: 5-month IFB-088 treatment does not impact motor function and nerve conduction velocity in WT mice.** (a) Four limb grip strength max values average of 10 trials. Data were expressed in grams (g) as mean  $\pm$ SEM.  $n=14-15$  mice per condition. (b) Rotarod analysis. Data are expressed in seconds (s) as mean  $\pm$ SEM.  $n=14-15$  mice per condition. (c) Motor nerve conduction velocity (MNCV). Data are expressed in meter/second (m/s) as mean  $\pm$ SEM.  $n=14-15$  mice per condition. (d) Sensory nerve conduction velocity (SNCV). Data are expressed in meter/second (m/s) as mean  $\pm$ SEM.  $n=13-14$  mice per condition.

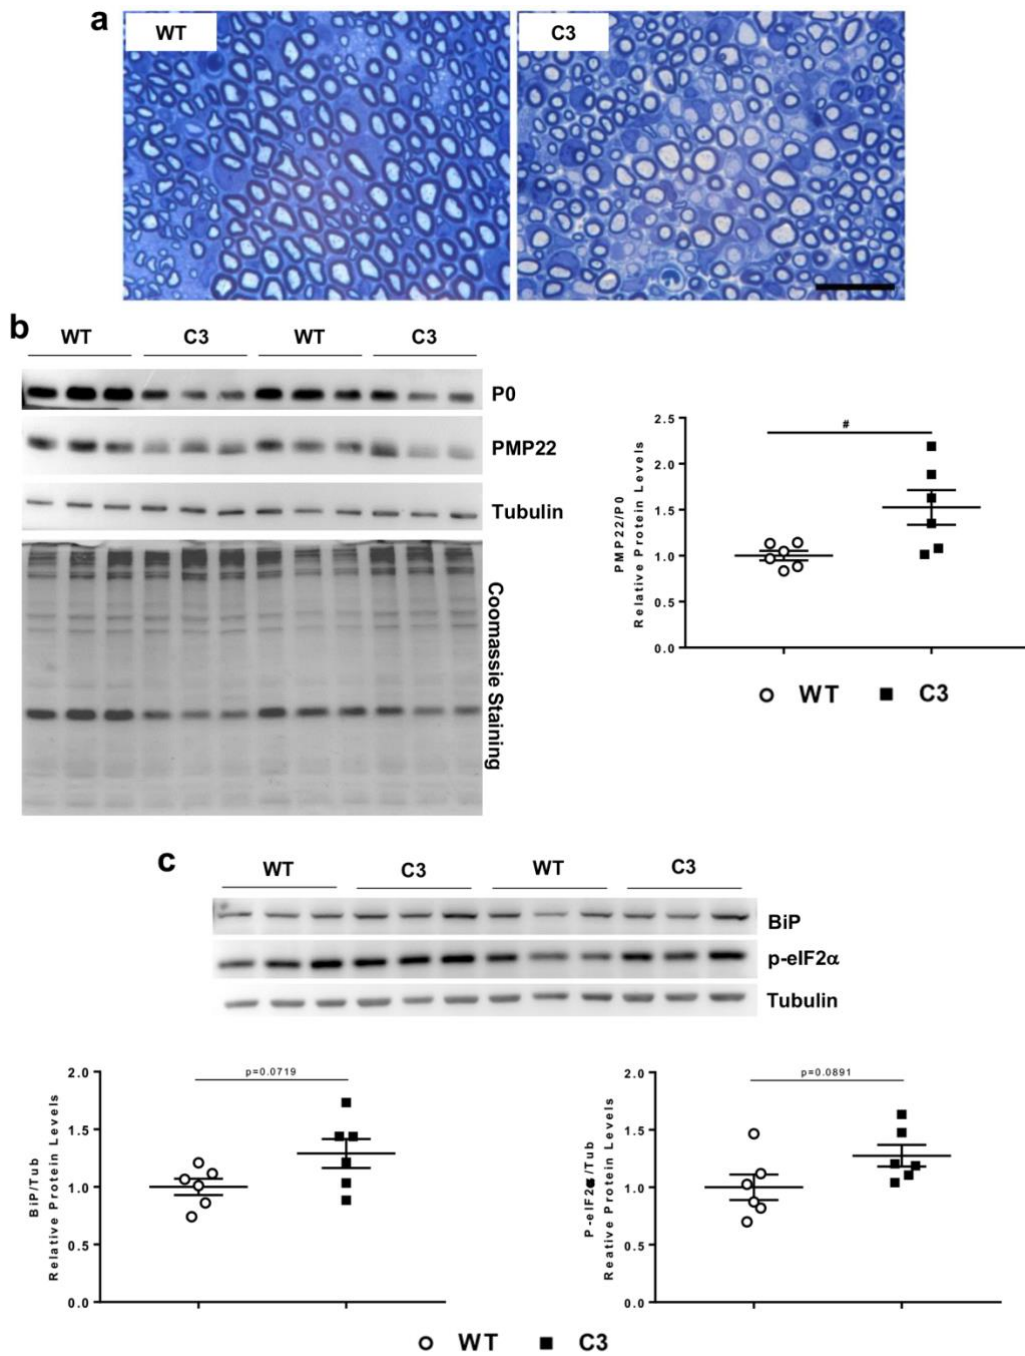

Supplementary Figure 5

**Supplemental Figure 5: At PND15, C3-PMP22 mice present a CMT1A-like phenotype with a relative overexpression of PMP22 and expression of ER Stress/UPR markers.** (a) Toluidine-blue stained transverse semithin-sections from sciatic nerve from 15-day-old WT and C3-PMP22 (C3) mice. Scale bar, 10µm. (b) Left: Representative WB for PMP22 and P0 on sciatic nerve protein extracts from 15-day-old WT and C3-PMP22 (C3) mice. Tubulin and Coomassie staining of total proteins were used as loading controls. Right: Quantification of the PMP22/P0 protein ratio relative to total protein. # $P < 0.05$  by Mann-Whitney. (c) Top: Representative WB for BiP, P-eIF2 $\alpha$  and tubulin on sciatic nerve protein extracts from 15-day old WT and C3-PMP22 (C3) mice. Bottom: quantification of protein level from  $n=6$  independent nerves. Tubulin was used as loading control. Student's T-test.

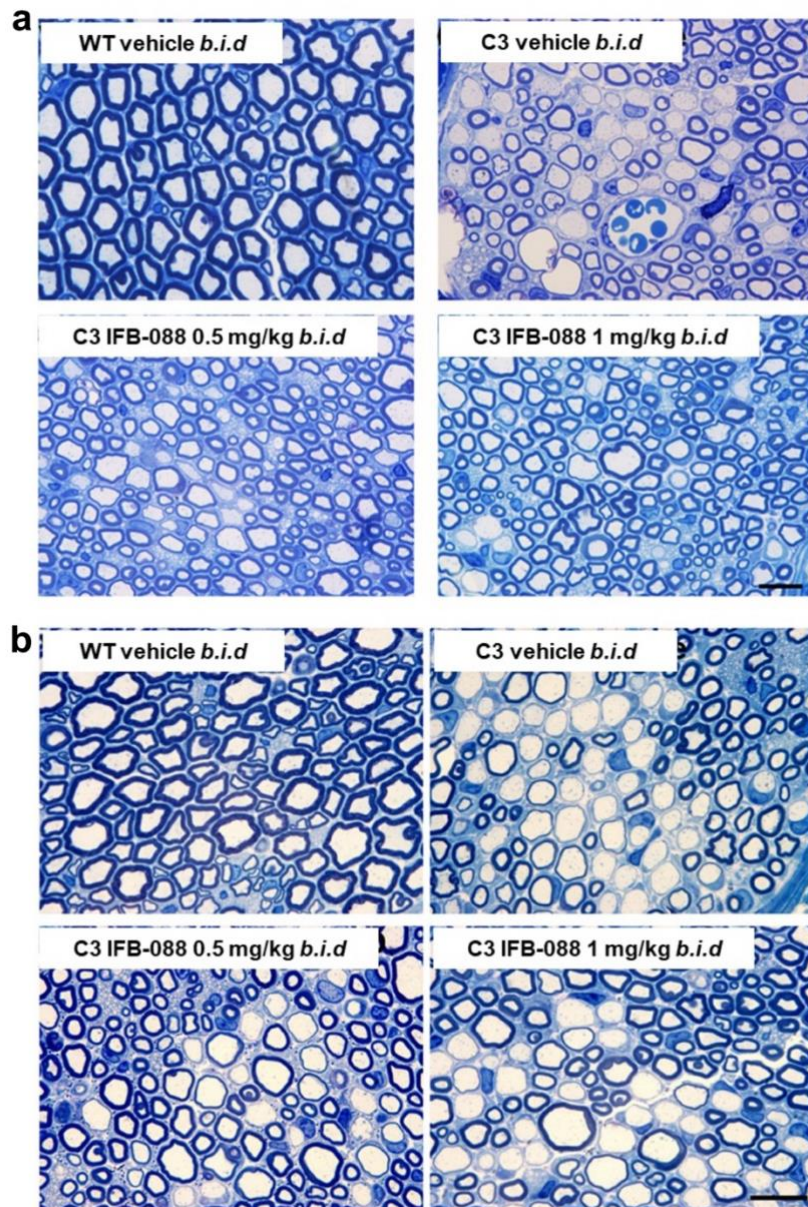

**Supplementary Figure 6**

**Supplemental Figure 6: Treatment with IFB-088 improves C3-PMP22 mice sciatic nerve morphology.** Toluidine blue-stained sciatic nerve sections from (a) female and (b) male WT mice treated with vehicle *b.i.d.* and C3-PMP22 mice treated with vehicle or IFB-088 at 0.5 or 1mg/kg *b.i.d.* for 12 weeks. Scale bar, 10 $\mu$ m.

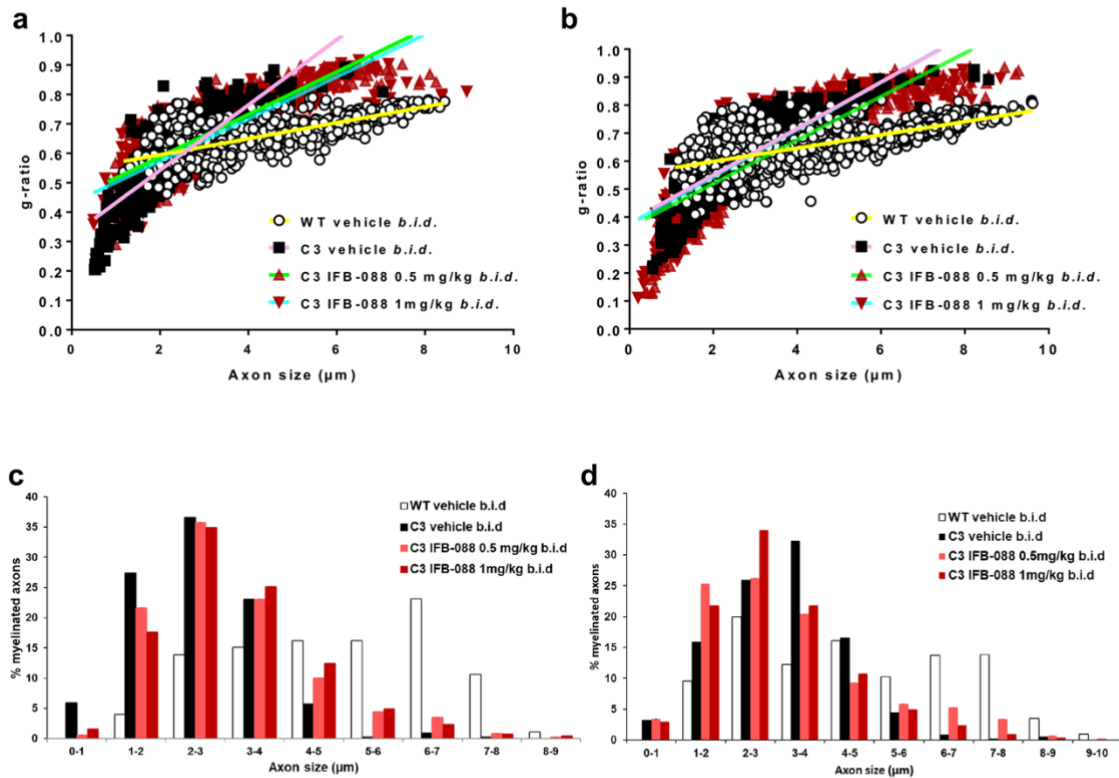

**Supplementary Figure 7**

**Supplemental Figure 7: Treatment with IFB-088 improves morphology of C3-PMP22 quadriceps femoral nerve.** Scatter plot of quadriceps femoral nerve g-ratios from WT mice treated with vehicle *b.i.d.* and C3-PMP22 (C3) mice treated with vehicle *b.i.d.* or IFB-088 at 0.5 or 1mg/kg *b.i.d.* (a) Females, (b) males. Note the “cloud” of axons with diameter lower than 1 $\mu$ m mostly restricted to vehicle treated C3-PMP22 nerves, and the appearance of a considerable number of myelinated axons larger than 5-6 $\mu$ m in treated C3-PMP22 nerves. Percentage of myelinated axons per axons size. (c) Females, (d) males.  $n=2-4$  nerves per condition.

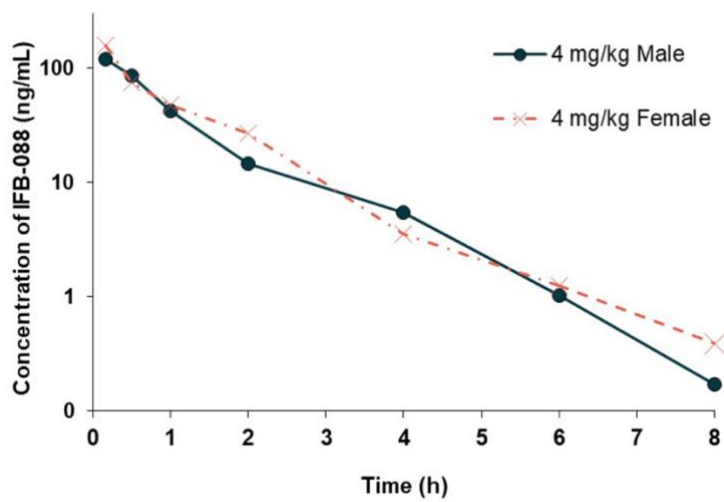

### Supplementary Figure 8

**Supplemental Figure 8: IFB-088 pharmacokinetic profile.** Plasma IFB-088 concentration in C57BL6/J males and females after a single administration at 4 mg/kg. Data are expressed in ng/mL as a mean.
